# Supplementary material for: Predictability Limits of North American Winter Precipitation in The Seamless System for Prediction and Earth System Research
Source: Research Square preprint supplement (doi:10.21203/rs.3.rs-6280010/v1), 2025-04-03
Supplement: Supplementary file 1 [file 3d178b5d02e6a3c7b948dfff.pdf]

*Supporting Information for*

**Predictability Limits of North American Winter Precipitation in The Seamless System for Prediction and Earth System Research**

**Joseph P. Clark<sup>1</sup>, Nathaniel Johnson<sup>2</sup>**

<sup>1</sup>Program in Atmospheric and Oceanic Sciences, Princeton University, Princeton, NJ.

<sup>2</sup>National Oceanic and Atmospheric Administration/Geophysical Fluid Dynamics Laboratory, Princeton, NJ.

**Contents of this file**

Figure S1

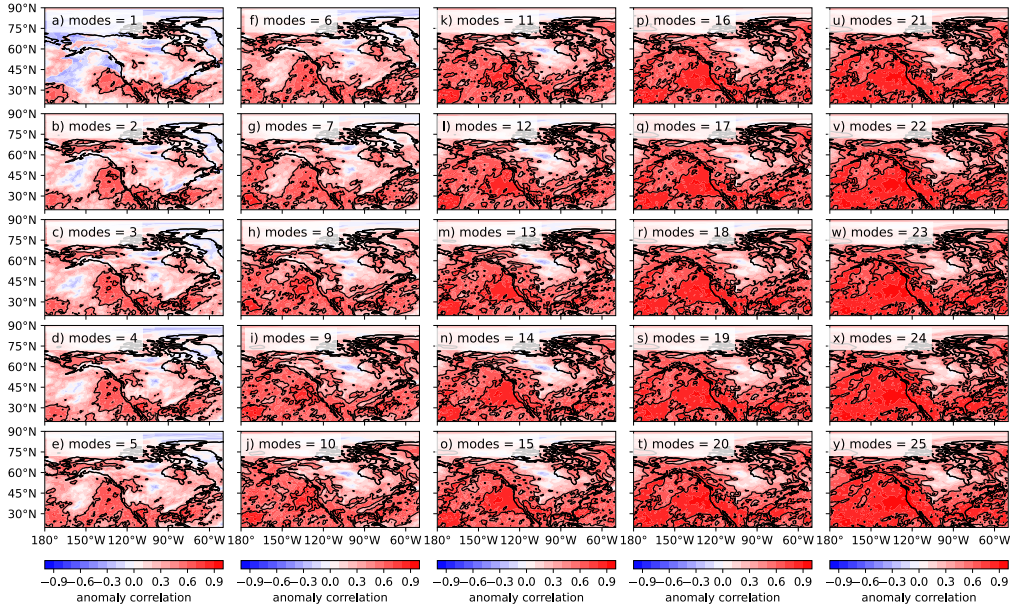

**Figure S1.** The correlation between ERA5 precipitation and (a)  $p_1v_1$ , (b)  $p_1v_1 + p_2v_2$ , (c)  $p_1v_1 + p_2v_2 + p_3v_3$  and so forth until panel (y)  $p_1v_1 + \dots + p_{25}v_{25}$ , where each  $p_i$  represents an APT pattern and each  $v_i$  represents the projection of ERA5 precipitation onto the corresponding  $q_i$  pattern (see data and methods in the main text). In other words, each panel shows the correlation between unfiltered ERA5 data and the ERA5 data filtered to the mode indicated in each panel.
